# Supplementary material for: Prognostic Role of MicroRNA-181a/b in Hematological Malignancies: A Meta-Analysis
Source: PubMed Central journal article supplement (PMC3606212; doi:10.1371/journal.pone.0059532), 2013-03-22
Supplement: pone.0059532.s002.pdf [file pone.0059532.s002.pdf]

**Table S1. Summary table of eligible studies**

| Study_id          | Publication year | Origin | Study design <sup>a</sup> | Disease <sup>b</sup>               | Sample size | miR-181 <sup>c</sup> | Dichotomization | Methods <sup>d</sup> | Cut-off                                  | Survival analysis <sup>e</sup> | HR estimation   | Follow_up                                                |
|-------------------|------------------|--------|---------------------------|------------------------------------|-------------|----------------------|-----------------|----------------------|------------------------------------------|--------------------------------|-----------------|----------------------------------------------------------|
| Schetter.et al.   | 2008             | US     | R                         | colon adenocarcinoma               | 84          | b                    | high:low        | microarray           | highest tertile                          | OS                             | Reported        | 68.0(26.0-141.9) months                                  |
| Gao.et al.        | 2010             | CH     | R                         | NSCLC                              | 47          | a                    | high:Low        | TaqMan               | median                                   | OS                             | Reported        | high:0-55;low:0-58 months                                |
| Rossi.et al.      | 2010             | US     | R                         | CLL                                | 86          | b                    | high:low        | TaqMan               | median                                   | OS                             | Reported        | 20(0-88) months                                          |
| Schwind.et al.(1) | 2010             | US     | R                         | CN-AML with FLT3-ITD and/or NPM1wt | 122         | a                    | high:low        | microarray           | median                                   | OS                             | Reported        | 6.5(3.10-11.0) years                                     |
| Schwind.et al.(2) | 2010             | US     | R                         | CN-AML with FLT3-ITD and/or NPM1wt | 122         | a                    | high:low        | microarray           | median                                   | OS                             | Reported        | estimated 24 months                                      |
| Zhi.et al.        | 2010             | CH     | R                         | astrocytoma                        | 124         | b                    | high:low        | SYBR Green           | median                                   | OS                             | Reported        | Training set 34.3(1-98);Validation set 37.1(1-92) months |
| Jiang.et al.      | 2011             | CH     | R                         | gastric cancer                     | 55          | b                    | high:low        | TaqMan               | median                                   | OS                             | Reported        | high:1-12.7;low:1-16.6 months                            |
| Li.et al.(1)      | 2012             | US     | R                         | CA-AML                             | 33          | a/b                  | high:low        | microarray           | median                                   | OS                             | Reported        | low:0-5;high 0-5 years                                   |
| Li.et al.(2)      | 2012             | US     | R                         | CA-AML                             | 53          | a/b                  | high:low        | microarray           | median                                   | OS                             | Reported        | low:0-4.8;high 0-5 years                                 |
| Ota.et al.        | 2011             | JP     | R                         | breast cancer                      | 291         | a                    | high:low        | TaqMan               | highest value of 95% confidence interval | OS                             | Available data  | 61(2-90) months                                          |
| Zhu.et al.        | 2012             | CH     | R                         | CLL                                | 150         | a/b                  | high:low        | SYBR Green           | mean                                     | OS                             | Author provided | 29(2-160) months                                         |
| Nakajima.et al.   | 2006             | JP     | R                         | colon cancer                       | 46          | b                    | high:low        | TaqMan               | 3-fold                                   | OS                             | Survival Curve  | high:0-1032;low:0-1400 days                              |
| Yang.et al.       | 2011             | TW     | R                         | OSCC                               | 39          | a&b                  | high:low        | TaqMan               | mean                                     | OS                             | Reported        | 22.5±12.5 months                                         |

- a. Study design: retrospective(R);
- b. Disease: NSCLC (non small cell lung cancer), CN-AML (cytogenetical normal acute myeloid leukemia), CA-AML (cytogenetically abnormal myeloid leukemia), CLL (chronic lymphoid leukemia) and OSCC ( oral squamous cell carcinoma);
- c. MiR-181: a/b represents that miR181-a and miR-181b were tested respectively in the studies, a&b represents miR181a and miR-181b were tested together as a combination;
- d. Methods: Both TaqMan and SYBR Green are quantification real time PCR methods;
- e. Survival analysis: OS (overall survival).
